# Supplementary material for: MicroRNA profiles in serum samples from Acute-On-Chronic Liver Failure patients and miR-25-3p as a potential biomarker for survival prediction
Source: PubMed Central journal article supplement (PMC6952390; doi:10.1038/s41598-019-56630-5), 2020-01-09
Supplement: 41598_2019_56630_MOESM1_ESM.pdf [file 41598_2019_56630_MOESM1_ESM.pdf]

## SUPPLEMENTARY INFORMATION

### **MicroRNA profiles in serum samples from Acute-On-Chronic Liver Failure patients and miR-25-3p as a potential biomarker for survival prediction**

Júlia Cisilotto<sup>1</sup>; Alex Evangelista do Amaral<sup>1</sup>; Daiane Rosolen<sup>1</sup>; Michele Patrícia Rode<sup>1</sup>; Adny Henrique Silva<sup>2</sup>; Evelyn Winter<sup>3</sup>; Telma Erotides da Silva<sup>4</sup>; Josiane Fischer<sup>4</sup>; Camila Matiollo<sup>4</sup>; Elayne Cristina de Moraes Rateke<sup>4</sup>; Janaína Luz Narciso-Schiavon<sup>4</sup>, Leonardo de Lucca Schiavon<sup>4</sup>; Tânia Beatriz Creczynski-Pasa<sup>1</sup>.

<sup>1</sup>Department of Pharmaceutical Sciences, Federal University of Santa Catarina, Florianópolis, 88040-900, SC, Brazil

<sup>2</sup>Department of Biochemistry, Federal University of Santa Catarina, Florianópolis, 88040-900, SC, Brazil

<sup>3</sup>Department of Agriculture, Biodiversity and Forestry, Federal University of Santa Catarina, Curitibanos, 89520-000, SC, Brazil

<sup>4</sup>Department of Internal Medicine, Division of Gastroenterology, Federal University of Santa Catarina, Florianópolis, 88040-900, SC, Brazil

#### **\*Corresponding Authors:**

**Tânia Beatriz Creczynski-Pasa**

Tel/Fax: (+55 (48) 32212200

e-mail: tania.pasa@ufsc.br

**Leonardo de Lucca Schiavon**

Tel/Fax: (+55 (48) 32096854

e-mail: leo-jf@uol.com.br

Figure S1 are shown the miRNAs expressed on patients who used in relation who not used medications treatment at admission in the hospital. Table S1 are shown the miRNAs expression and their association with different variables in liver disease and Table S2 the Spearman's correlation coefficient between miRNAs and biochemical parameters associated with liver disease. Furthermore, in Figure S2 it is observed the biological pathway enrichment analysis of miR-25-3p target genes.

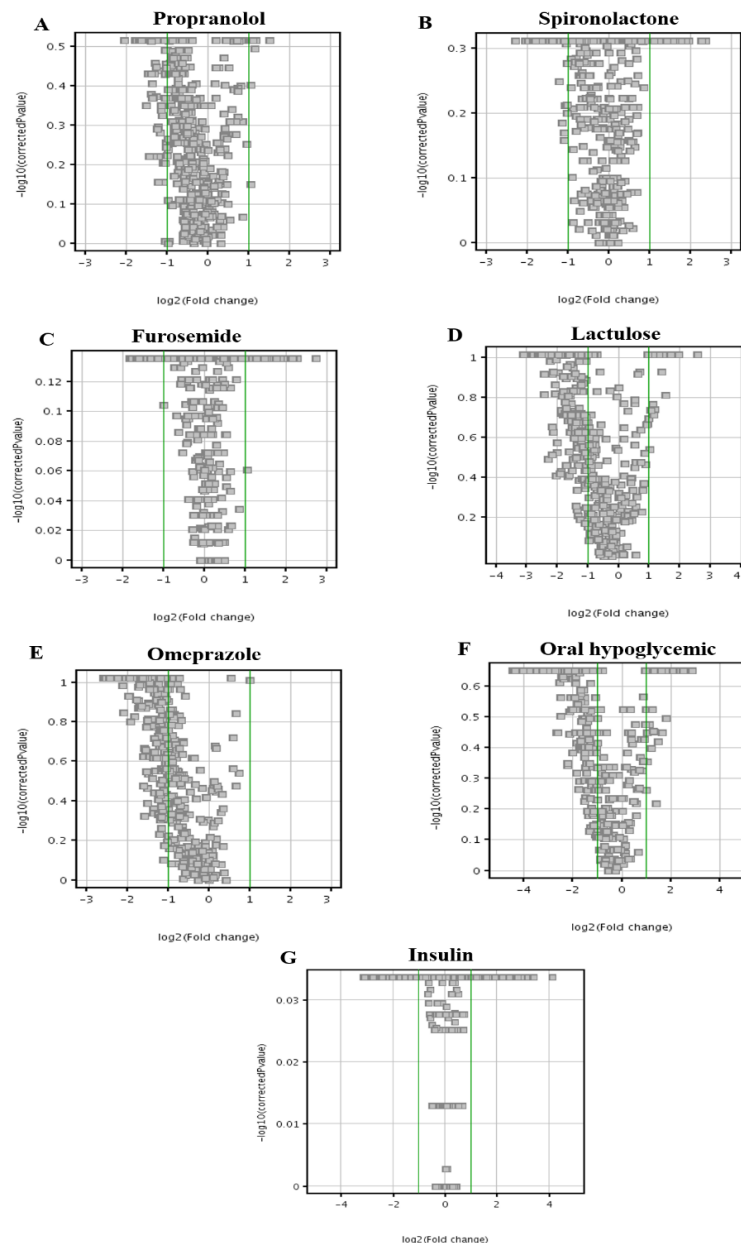

**Figure S1.** Volcano plot of miRNAs expressed after a Mann-Whitney U test and Benjamin Hochberg post-hoc test (fold change > 2 and P-values < 0.05) on patients who used or not propranolol (A); spironolactone (B); furosemide (C); lactulose (D); omeprazole (E), oral hypoglycemic (F), insulin (G).

**Table S1.** miRNAs expression and their association with different studied variables.

| Parameters                                    | P-value<br>miRNA |        |        |         |         |
|-----------------------------------------------|------------------|--------|--------|---------|---------|
|                                               | 106b-5p          | 126-3p | 20a-5p | 223-3p  | 25-3p   |
| <b>Gender</b>                                 | 0.595            | 0.963  | 0.923  | 0.671   | 0.339   |
| <b>Etiology of cirrhosis</b>                  |                  |        |        |         |         |
| Hepatitis B                                   | 0.218            | 0.171  | 0.782  | 0.328   | 0.320   |
| Hepatitis C                                   | 0.910            | 0.934  | 0.931  | 0.566   | 0.879   |
| Alcohol                                       | 0.374            | 0.354  | 0.781  | 0.940   | 0.402   |
| <b>Medications use at admission</b>           |                  |        |        |         |         |
| Propranolol                                   | 0.763            | 0.974  | 0.979  | 0.409   | 0.538   |
| Spironolactone                                | 0.532            | 0.830  | 0.657  | 0.439   | 0.762   |
| Furosemide                                    | 0.081            | 0.132  | 0.161  | 0.802   | 0.346   |
| Lactulose                                     | 0.413            | 0.237  | 0.641  | 0.988   | 0.597   |
| Norfloxacin                                   | 0.518            | 0.812  | 0.869  | 0.649   | 0.864   |
| Omeprazole                                    | 0.132            | 0.317  | 0.269  | 0.206   | 0.422   |
| Oral hypoglycemic*                            | 0.330            | 0.425  | 0.943  | 0.885   | 0.580   |
| Insulin                                       | 0.455            | 0.821  | 0.380  | 0.242   | 0.664   |
| <b>Child-Pugh C</b>                           | 0.615            | 0.338  | 0.907  | 0.150   | 0.338   |
| <b>Bacterial infection (first 48 h)</b>       | 0.500            | 0.587  | 0.522  | 0.587   | 0.794   |
| <b>Gastrointestinal bleeding (first 48 h)</b> | 0.199            | 0.082  | 0.199  | 0.202   | 0.125   |
| <b>Complication at admission</b>              |                  |        |        |         |         |
| Ascites                                       | 0.765            | 0.833  | 0.899  | 0.484   | 0.333   |
| Hepatic encephalopathy                        | 0.402            | 0.203  | 0.203  | 0.005** | 0.034*  |
| <b>Organ failures</b>                         |                  |        |        |         |         |
| Kidney                                        | 0.987            | 0.885  | 0.403  | 0.218   | 0.131   |
| Hepatic                                       | 0.342            | 0.467  | 0.187  | 0.130   | 0.057   |
| Brain                                         | 0.235            | 0.127  | 0.271  | 0.020*  | 0.073   |
| Coagulation                                   | 0.706            | 0.873  | 0.919  | 0.805   | 0.717   |
| Circulatory                                   | 0.550            | 0.165  | 0.596  | 0.636   | 0.995   |
| <b>ACLF</b>                                   | 0.597            | 0.362  | 0.258  | 0.026*  | 0.009** |

ACLF. acute-on-chronic liver failure; \*metformin, glibenclamide and mlimepiride. Statistical differences were calculated using Mann-Whitney U test. \*P<0.05, \*\*P<0.01.

**Table S2.** Spearman's correlation coefficient between miRNAs and biochemical parameters associated with liver disease.

| Variables             | miRNA   |         |        |         |           |           |
|-----------------------|---------|---------|--------|---------|-----------|-----------|
|                       |         | 106b-5p | 126-3p | 20a-5p  | 223-3p    | 25-3p     |
| Age                   | r       | -0.165  | -0.133 | -0.127  | -0.193*   | -0.106    |
|                       | P-value | 0.056   | 0.125  | 0.143   | 0.025     | 0.220     |
| Creatinine            | r       | -0.140  | -0.096 | -0.212* | -0.302*** | -0.341*** |
|                       | P-value | 0.101   | 0.259  | 0.012   | <0.001    | <0.001    |
| Total leukocyte       | r       | -0.212* | -0.074 | -0.166  | -0.021    | -0.153    |
|                       | P-value | 0.012   | 0.384  | 0.051   | 0.803     | 0.072     |
| ALP                   | r       | -0.010  | 0.017  | 0.098   | 0.062     | 0.019     |
|                       | P-value | 0.902   | 0.843  | 0.249   | 0.471     | 0.823     |
| GGT                   | r       | -0.126  | 0.026  | -0.043  | 0.055     | -0.028    |
|                       | P-value | 0.141   | 0.760  | 0.615   | 0.519     | 0.745     |
| Total bilirubin       | r       | -0.051  | -0.028 | -0.046  | -0.065    | -0.111    |
|                       | P-value | 0.556   | 0.744  | 0.591   | 0.452     | 0.198     |
| Albumin               | r       | 0.057   | 0.027  | 0.054   | 0.054     | 0.025     |
|                       | P-value | 0.515   | 0.757  | 0.538   | 0.535     | 0.773     |
| INR                   | r       | 0.056   | 0.072  | 0.050   | 0.060     | 0.030     |
|                       | P-value | 0.518   | 0.406  | 0.565   | 0.488     | 0.731     |
| Sodium                | r       | -0.041  | -0.101 | -0.050  | -0.006    | 0.016     |
|                       | P-value | 0.640   | 0.245  | 0.563   | 0.946     | 0.857     |
| CRP                   | r       | -0.080  | -0.038 | -0.059  | 0.012     | -0.056    |
|                       | P-value | 0.373   | 0.669  | 0.511   | 0.891     | 0.529     |
| Mean blood pressure   | r       | -0.001  | -0.086 | -0.014  | 0.058     | 0.092     |
|                       | P-value | 0.994   | 0.325  | 0.871   | 0.508     | 0.292     |
| CLIF-SOFA             | r       | -0.079  | -0.092 | -0.107  | -0.186*   | -0.196*   |
|                       | P-value | 0.370   | 0.296  | 0.224   | 0.034     | 0.026     |
| Child-Pugh pontuation | r       | -0.050  | -0.088 | -0.065  | -0.130    | -0.130    |
|                       | P-value | 0.559   | 0.308  | 0.448   | 0.129     | 0.131     |
| MELD score            | r       | -0.070  | -0.049 | -0.089  | -0.150    | -0.185*   |
|                       | P-value | 0.414   | 0.567  | 0.296   | 0.078     | 0.029     |

ALP. alkaline phosphatase; GGT.  $\gamma$ -glutamyl transpeptidase; INR. international normalized ratio; CRP. C-reactive protein; MELD. Model for End-stage Liver Disease; r. Spearman's correlation coefficient; \*P<0.05; \*\*\*P<0.001.

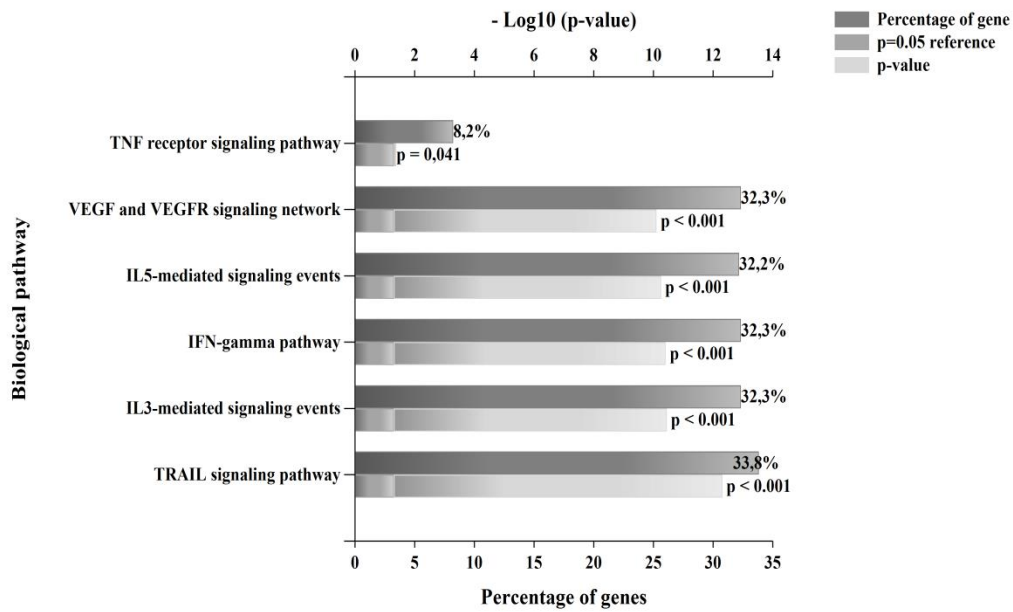

**Figure S2.** Biological pathway enrichment analysis of miR-25-3p target genes. TNF. tumor necrosis factor; VEGF. vascular endothelial growth factor; VEGFR. vascular endothelial growth factor receptor; IL5. interleukin 5; INF. interferon; IL3. interleukin 3; TRAIL. tumor necrosis factor-related apoptosis-inducing ligand.
